# Supplementary material for: Subversion of Autophagy in Adherent Invasive Escherichia coli-Infected Neutrophils Induces Inflammation and Cell Death
Source: PubMed Central journal article supplement (PMC3522719; doi:10.1371/journal.pone.0051727), 2012-12-14
Supplement: pone.0051727.s005.pdf [file pone.0051727.s005.pdf]

**Table S1: Primer sequences used in this study:**

*il-8*: 5'-ATGACTTCCAAGCTGGCCGTG-3' (forward)  
5'-CTTGAG AGTGGCATAGACTTCTGTCT-3' (reverse);

*atg5*: 5'-GCCATAGCTTGGAGTAGGTTTG GC-3' (forward)  
5'-GCGTGAAACAAGTTGGAATTCGTCC-3' (reverse);

*p62*: 5'-CT TCCTGACGCTGCTGCTCTTCTGC-3' (forward)  
5'-GCTCAGCTGCGTGCAACCG ATC-3' (reverse),

*36B4*: 5'-TCCAGGCTTTGGGCATCA-3' (forward)  
5'-TCTCAGCC CTCTTCAAAAACCT-3' (reverse)
